# Supplementary material for: Evaluation of Subclinical Retinal Disease in Patients Affected by Systemic Lupus Erythematosus with No Evidence of Ocular Involvement—An Optical Coherence Tomography Angiography Original Study
Source: MDPI journal article supplement (doi:10.3390/jcm11247417), 2022-12-14
Supplement: s1 [file s1]

**Table S1.** Multiple regression analysis between VD SRCP nasal and the following variables. R = 0.64617387

|                        | b        | t(19)    | P value |
|------------------------|----------|----------|---------|
| Age                    | 0.01094  | 0.41584  | 0.68    |
| Sex                    | -0.81880 | -0.75506 | 0.46    |
| SLEDAI-2K              | -0.07936 | -0.95577 | 0.35    |
| Disease duration       | -0.00709 | -1.41446 | 0.17    |
| SLICC/ACR Damage Index | 0.37849  | 1.32436  | 0.20    |
| Kidney involvement     | -1.89780 | -2.06566 | 0.05    |
| HCQ cumulative dose    | 0.00115  | 0.93377  | 0.36    |
| Azathioprine           | -0.74789 | -0.90726 | 0.38    |
| Methotrexate           | 0.23124  | 0.30574  | 0.76    |
| HCQ duration           | -0.61076 | -0.52763 | 0.60    |

Durbin-Watson d value - 1,345189.

**Table S2.** Multiple regression analysis between VD SRCP parafovea and the following variables. R= 0.63569661

|                        | b        | t(19)    | P value |
|------------------------|----------|----------|---------|
| Age                    | -0.02895 | -1.39298 | 0.18    |
| Sex                    | -0.63079 | -0.73669 | 0.47    |
| SLEDAI-2K              | 0.00300  | 0.04582  | 0.96    |
| Disease duration       | -0.00125 | -0.31602 | 0.76    |
| SLICC/ACR Damage Index | 0.17524  | 0.77659  | 0.45    |
| Kidney involvement     | -2.00618 | -2.76551 | 0.01    |
| HCQ cumulative dose    | 0.00061  | 0.62332  | 0.54    |
| Azathioprine           | -0.20132 | -0.30930 | 0.76    |
| Methotrexate           | -0.39426 | -0.66018 | 0.52    |
| HCQ duration           | -0.49641 | -0.54311 | 0.59    |

Durbin-Watson d value - 1,848533.

**Table S3.** Multiple regression analysis between VD SRCP inferior and the following variables. R= 0.58803251

|                        | b        | t(19)    | P value |
|------------------------|----------|----------|---------|
| Age                    | 0.01204  | 0.33477  | 0.74    |
| Sex                    | -1.62369 | -1.09577 | 0.29    |
| SLEDAI-2K              | -0.09192 | -0.81012 | 0.43    |
| Disease duration       | -0.00217 | -0.31616 | 0.76    |
| SLICC/ACR Damage Index | 0.02693  | 0.06895  | 0.95    |
| Kidney involvement     | -0.05766 | -0.04593 | 0.96    |
| HCQ cumulative dose    | -0.00013 | -0.07758 | 0.94    |
| Azathioprine           | 1.43384  | 1.27294  | 0.22    |
| Methotrexate           | -1.70418 | -1.64900 | 0.12    |
| HCQ duration           | -0.97257 | -0.61488 | 0.55    |

Durbin-Watson d value - 2,049834.

**Table S4** Multiple regression analysis between FAZ area and the following variables. R= 0.61252037

|                        | b         | t(19)    | P value |
|------------------------|-----------|----------|---------|
| Age                    | 0.000791  | 0.79146  | 0.44    |
| Sex                    | -0.007715 | -0.18747 | 0.85    |
| SLEDAI-2K              | -0.000333 | -0.10556 | 0.92    |
| Disease duration       | -0.000041 | -0.21345 | 0.83    |
| SLICC/ACR Damage Index | 0.006843  | 0.63098  | 0.54    |
| Kidney involvement     | 0.025925  | 0.74357  | 0.47    |
| HCQ cumulative dose    | -0.000044 | -0.93633 | 0.36    |
| Azathioprine           | -0.065260 | -2.08605 | 0.05    |
| Methotrexate           | 0.023060  | 0.80341  | 0.43    |
| HCQ duration           | -0.008870 | -0.20192 | 0.84    |

Durbin-Watson d value - 2,124973.

**Table S5** Multiple regression analysis between FAZ Circularity index and the following variables. R= 0.48202293

|                        | b         | t(19)    | P value |
|------------------------|-----------|----------|---------|
| Age                    | 0.000374  | 0.24391  | 0.81    |
| Sex                    | 0.096357  | 1.52502  | 0.14    |
| SLEDAI-2K              | 0.000814  | 0.16822  | 0.87    |
| Disease duration       | 0.000129  | 0.44291  | 0.66    |
| SLICC/ACR Damage Index | -0.022036 | -1.32338 | 0.20    |
| Kidney involvement     | 0.054582  | 1.01964  | 0.32    |
| HCQ cumulative dose    | 0.000017  | 0.24157  | 0.81    |
| Azathioprine           | -0.061406 | -1.27848 | 0.22    |
| Methotrexate           | 0.023240  | 0.52737  | 0.60    |
| HCQ duration           | -0.007949 | -0.11786 | 0.91    |

Durbin-Watson d value - 2,280719.

**Table S6** Power analysis for comparison of OCTA parameters between SLE and control group.

| Analyzed parameter      | Mean +/- SD<br>SLE | Mean +/- SD<br>Control | Power |       | Required sample size |
|-------------------------|--------------------|------------------------|-------|-------|----------------------|
|                         |                    |                        | Alfa  | value |                      |
| VD SRCP % - fovea       | 22.16 ± 3.63       | 20.14 ± 3.76           | 0,05  | 0,8   | 52                   |
| VD SRCP - superior      | 48.68 ± 2.69       | 49.52 ± 2.01           | 0,05  | 0,8   | 162                  |
| VD SRCP - inferior      | 48.82 ± 2.36       | 50.08 ± 2.44           | 0,05  | 0,8   | 57                   |
| VD SRCP - nasal         | 45.82 ± 1.83       | 46.99 ± 1.57           | 0,05  | 0,8   | 40                   |
| VD SRCP - temporal      | 46.7 ± 2.65        | 47.45 ± 2.5            | 0,05  | 0,8   | 197                  |
| VD SRCP - parafovea     | 47.51 ± 1.43       | 48.51 ± 1.5            | 0,05  | 0,8   | 34                   |
| VD SRCP - whole en face | 44.69 ± 1.4        | 45.36 ± 1.32           | 0,05  | 0,8   | 70                   |
| VD DRCP % - fovea       | 20.88 ± 4.03       | 18.94 ± 3.89           | 0,05  | 0,8   | 69                   |
| VD DRCP - superior      | 52.27 ± 2.95       | 52.98 ± 2.42           | 0,05  | 0,8   | 272                  |
| VD DRCP - inferior      | 52.48 ± 2.43       | 53.59 ± 2.5            | 0,05  | 0,8   | 77                   |
| VD DRCP - nasal         | 50.08 ± 2.18       | 50.52 ± 1.99           | 0,05  | 0,8   | 387                  |
| VD DRCP - temporal      | 49.73 ± 2.86       | 50.31 ± 2.81           | 0,05  | 0,8   | 383                  |
| VD DRCP - parafovea     | 51.14 ± 1.7        | 51.85 ± 1.73           | 0,05  | 0,8   | 91                   |
| VD DRCP - whole en face | 47.78 ± 1.59       | 48.2 ± 1.52            | 0,05  | 0,8   | 226                  |
| FAZ - area              | 0.16 ± 0.07        | 0.2 ± 0.08             | 0,05  | 0,8   | 50                   |
| FAZ - perimeter         | 1.53 ± 0.36        | 1.67 ± 0.36            | 0,05  | 0,8   | 105                  |
| FAZ - circularity index | 0.79 ± 0.09        | 0.94 ± 0.63            | 0,05  | 0,8   | 7                    |

**Table S7** Power analysis for multiple regression analysis

| Analyzed parameter    | P <sup>2</sup> | Alfa | Power |  | Required sample size |
|-----------------------|----------------|------|-------|--|----------------------|
|                       |                |      | value |  |                      |
| VD SRCP nasal         | 0,41           | 0,05 | 0,9   |  | 41                   |
| VD SRCP parafovea     | 0,09           | 0,05 | 0,9   |  | 213                  |
| VD SRCP inferior      | 0,35           | 0,05 | 0,9   |  | 50                   |
| FAZ area              | 0,37           | 0,05 | 0,9   |  | 47                   |
| FAZ circularity index | 0,23           | 0,05 | 0,9   |  | 79                   |
